# Supplementary material for: Diversity of an uncommon elastic hypersaline microbial mat along a small-scale transect
Source: PeerJ journal article supplement (doi:10.7717/peerj.13579), 2022-06-20

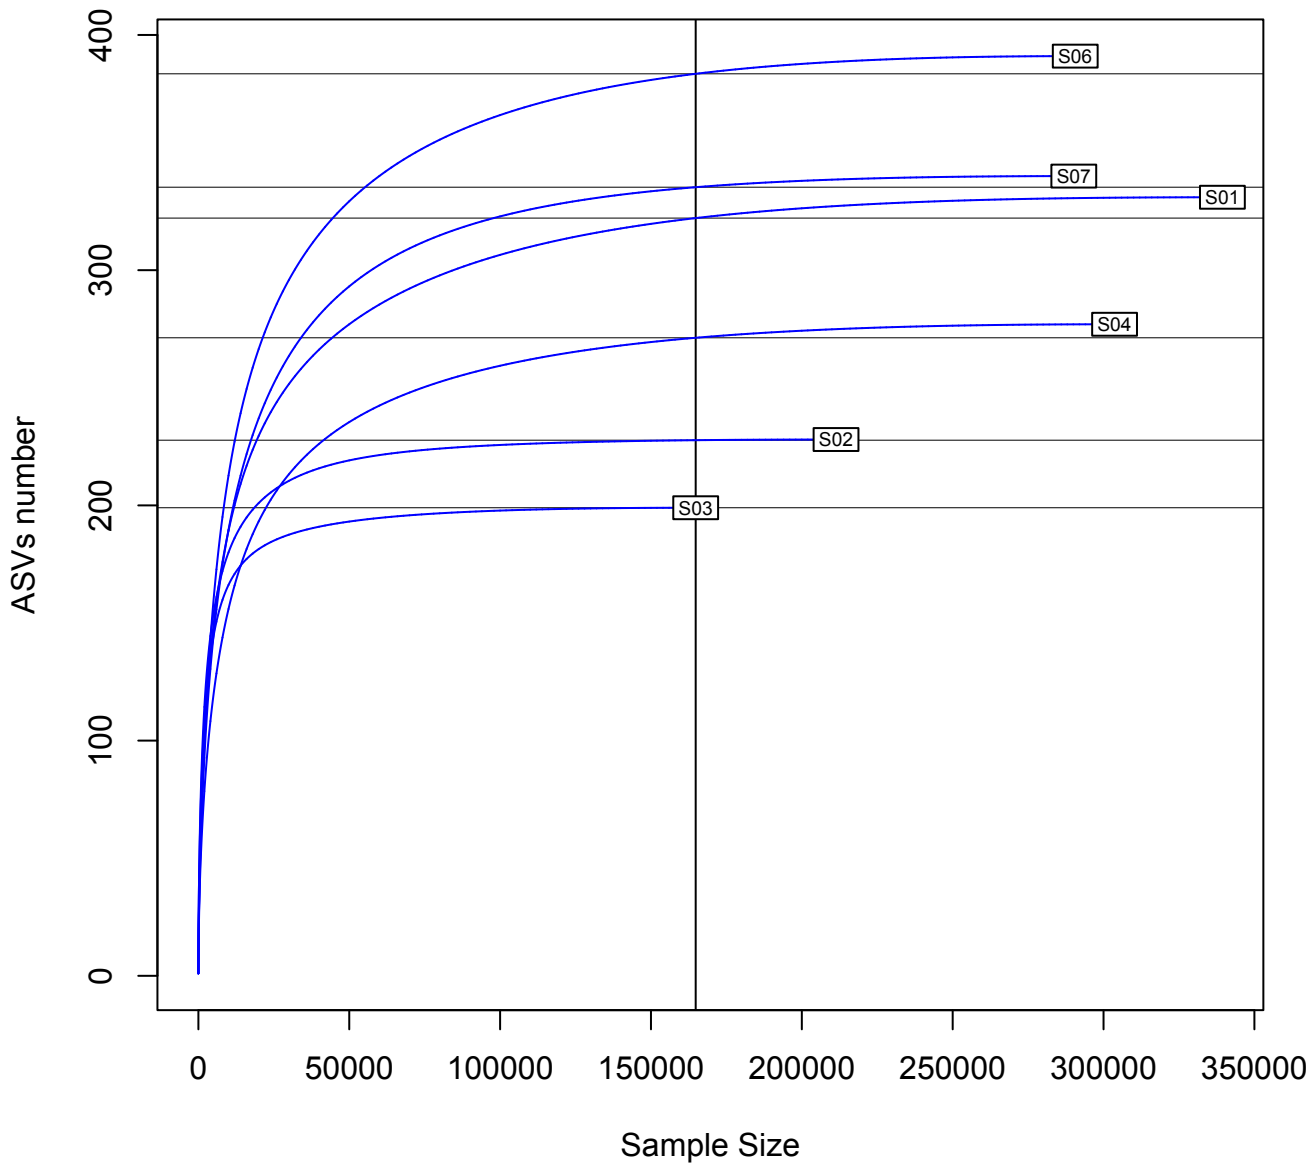

Supplement: Suppl_2_b_R1.pdf [file Suppl_2_b_R1.pdf]
